# Supplementary material for: Ecological insights into low-level antibiotics interfered biofilms of Synechococcus elongatus
Source: Royal Society of Chemistry journal article supplement (doi:10.1039/c6ra15025j), 2016-01-01
Supplement: c6ra15025j1.pdf [file c6ra15025j1.pdf]

## Supplementary Information

2

### 3 Methods and materials

#### 4 Bacterial strain, chemicals, and media

5 *Synechococcus elongatus* PCC7942 was obtained from ATCC (American Type  
6 Culture Collection, ATCC 33912). The BG-11 media contain the following composition  
7 per liter: 1.5 g NaNO<sub>3</sub>, 75 mg MgSO<sub>4</sub>·7H<sub>2</sub>O, 36 mg CaCl<sub>2</sub>·2H<sub>2</sub>O, 6 mg citric acid, 2.86  
8 mg H<sub>3</sub>BO<sub>3</sub>, 1.81 mg MnCl<sub>2</sub>·4H<sub>2</sub>O, 222 µg ZnSO<sub>4</sub>·7H<sub>2</sub>O, 390 µg Na<sub>2</sub>MoO<sub>4</sub>·2H<sub>2</sub>O, 79 µg  
9 CuSO<sub>4</sub>·5H<sub>2</sub>O, 49.4 µg Co(NO<sub>3</sub>)<sub>2</sub>·6H<sub>2</sub>O, 6 mg ferric ammonium citrate, 20 mg Na<sub>2</sub>CO<sub>3</sub>,  
10 and 30.5 mg KH<sub>2</sub>PO<sub>4</sub><sup>1</sup>. Different concentrations of kanamycin (Aladdin Co., China) were  
11 added into the media when needed. All chemicals were purchased from Sinopharm  
12 Chemical Reagents Co. Ltd unless otherwise stated.

#### 13 Cell growth and biofilm formation

14 *S. elongatus* was inoculated in BG-11 media at 30°C with constant light (2,000 -  
15 3,000 Lux) till early exponential phase (6 d) and stationary phase (12 d). The growth  
16 profiles were monitored via recording the optical density (OD) at 730 nm with a UV-  
17 2000 spectrophotometer (UNICO, USA) at different time intervals. The cells were then  
18 harvested, normalized to OD<sub>730</sub> 1.0, and inoculated to 12-well plates with BG-11 media  
19 and low-level concentrations of kanamycin (Aladdin Co., China) for biofilm formation  
20 experiments. The tested levels of kanamycin included 0, 0.05, 0.10 and 0.15 µg/mL,

21 which have neglectable effects on cell growth (Fig. S1). After 6 d, the whole culture and  
22 suspended cells in the 12-wells were quantified via measuring the amount of chlorophyll  
23 a by spectrophotometric method<sup>2</sup> and the biofilms were regarded as the differences of  
24 absorbance between whole culture and suspended cells.

## 25 **Transcriptional analysis**

26 The RNA was extracted from the *S. elongatus* cultured with kanamycin for 6 d using  
27 the RNAPrep pure Cell/Bacteria Kit (Tiangen Biotech. Co. Ltd., Beijing, China), and the  
28 cDNA was synthesized using the Primescript™ RT reagent kit (Takara Biotech. Co. Ltd.,  
29 Dalian, China). Quantitative real-time polymerase chain reaction was performed in 20 µL  
30 reaction mixture. The  $2^{-\Delta\Delta CT}$  method was used to quantify the expression levels of *rbcL*  
31 (encoding the large subunit of RuBisCO) and *icfA* (encoding the β-form carbonic  
32 anhydrase) using the 16s rDNA sequence as the housekeeping gene<sup>3</sup>. All experiments  
33 were followed by the protocols from manufacturers and the primers used in this study  
34 were summarized in Table S1.

35

## 36 **Reference**

37 1. S. Diamond, D. Jun, B. E. Rubin, and S. S. Golden, *Proc. Natl. Acad. Sci. U.S.A.*,  
38 2015, **112**, E1916–25.

- 39 2. D. Schatz, E. Nagar, E. Sendersky, R. Parnasa, S. Zilberman, S. Carmeli, Y. Mastai,  
40 E. Shimoni, E. Klein, O. Yeger, Z. Reich, and R. Schwarz, *Method Enzymol*, 2013, **15**,  
41 1786–1794.
- 42 3. F. Pinto, C. C. Pacheco, D. Ferreira, P. Moradas-Ferreira, and P. Tamagnini, *PLoS*  
43 *ONE*, 2012, **7**, e34983.

44 **Table S1 Primers used in this study**

| Primer Names        | Sequences              |
|---------------------|------------------------|
| <i>rbcL</i> forward | GGGTCTTCTTCACCCAAGATT  |
| <i>rbcL</i> reverse | CGGAGTCATCACCGAAGATTT  |
| <i>icfA</i> forward | TCAATCAGCTGCAAGAGGAC   |
| <i>icfA</i> reverse | CCAAGTCGTCAGTCTCATAACC |
| 16s rDNA forward    | GTAGCGGTGAAATGCGTAGA   |
| 16s rDNA reverse    | CGTCCATGAGCGTCAGTTAT   |

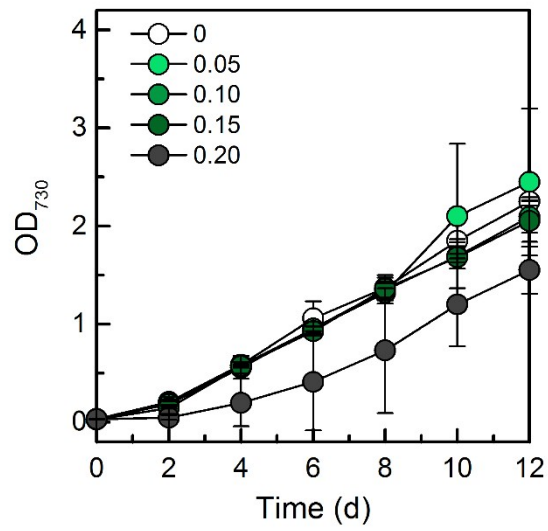

46

47

48 **Fig. S1** Growth profiles of *S. elongatus* in the presence of different concentrations of  
 49 kanamycin. All experiments were conducted at least in triplicate and the error bars denote  
 50  $\pm 1$  SD from the means of independent experiments.

51
